# Supplementary material
Source: publisher site journal article supplement (https://www.dovepress.com/get_supplementary_file.php?f=234042.docx)
Supplement: Supplementary file 1 [file get_supplementary_file.php]

Online Data Supplement

Geographical disparity and associated factors of COPD prevalence in China: a spatial analysis of national cross-sectional study

Ning WANG; Shu CONG; Jing FAN; Heling BAO; Baohua WANG; Ting YANG; Yajing FENG; Yang LIU; Linhong WANG; Chen WANG; Wenbiao HU; Liwen FANG

[e-Method 1 Detailed description of ordinary kriging method 2](#_Toc20845109)

[e-Method 2 Detailed description of spatial scan by SaTScan software 3](#_Toc20845110)

[e-Figure 1 Relative importance of COPD related risk factors among population aged 40 or older in different regions of China, 2015 4](#_Toc20845111)

[e-Figure 2 Geographic disparities of COPD prevalence among different Chinese subpopulations aged 40 or older in 2015 8](#_Toc20845112)

[e-Figure 3 Geographic disparities of the prevalence of current or former smoking among Chinese adults aged 40 or older in 2015 11](#_Toc20845113)

[e-Figure 4. Predicted COPD prevalence among different subpopulations in 31 provincial capitals of mainland China, 2015 12](#_Toc20845114)

[e-Table 1 The ten cities with the highest and lowest predicted COPD prevalence among Chinese adults aged 40 or older and adults aged 40 to 59 without a history of smoking (sorted by descending order) 13](#_Toc20845115)

[e-Table 2 Spatial clusters of predicted COPD prevalence among Chinese adults aged 40or older in 2015 14](#_Toc20845116)

# e-Method 1 Detailed description of ordinary kriging method

Ordinary kriging is one of the most widely used spatial interpolation method which is based on the regionalized variable theory. It uses the sampled data points to estimate the value over a continuous spatial area based on the spatial distribution of the empirical observations.

Two-step process is involved in Ordinary kriging interpolation. First, the spatial covariance structure among the sampled data is identified by fitting a semivariogram which can be used to quantify the spatial dependency of the data. A semivariogram is a visual depiction of the covariance in each pair of points of the sampled data. It increases with the distance between the pairs of geographic points in a specific distance range. At a certain distance, the semivariogram value reaches a plateau. To fit the semivariogram, covariances among sampled points and covariances between sampled points and the prediction points are needed.

Covariance among sampled points:

Covariance matrix of the n sampled data points

=

Covariance between sampled points and the prediction points:

Second, weights are computed from the semivariogram which is based on the covariance structure. Weights for each prediction point are calculated according to the spatial structure between this prediction point and all the sampled points.

Covariance vector between the sampled points and the prediction point

The formula:

Where Y(S0) refers to the predicted value which is equal to the sum of the observed value of each sampled point (yi) multiplies by point-specific weight (wi).

# e-Method 2 Detailed description of spatial scan by SaTScan software

The SaTScan software can identify the statistically significant clusters (P<0.05) of a certain disease, where a higher than expected number of COPD patients were observed. To detect the clusters, datasets on cases, population and coordinates of the locations should be input. Based on these data, the software imposes a circular window on the map. The window is centered on each of the possible locations throughout the map and continuously varies its radius in size. The observed and expected cases inside each circle and the likelihood are calculated to examine the statistical significance.

We used the default settings for the SaTScan software for this study. The maximum spatial cluster size was set as 50% percent of the population at risk. We loaded the city-specific numbers of COPD cases which were calculated by applying the city-specific interpolated prevalence to the population aged 40 years or older retrieved from 2010 census (the most recent national census in China).

# e-Figure 1 Relative importance of COPD related risk factors among population aged 40 or older in different regions of China, 2015

1. **East**


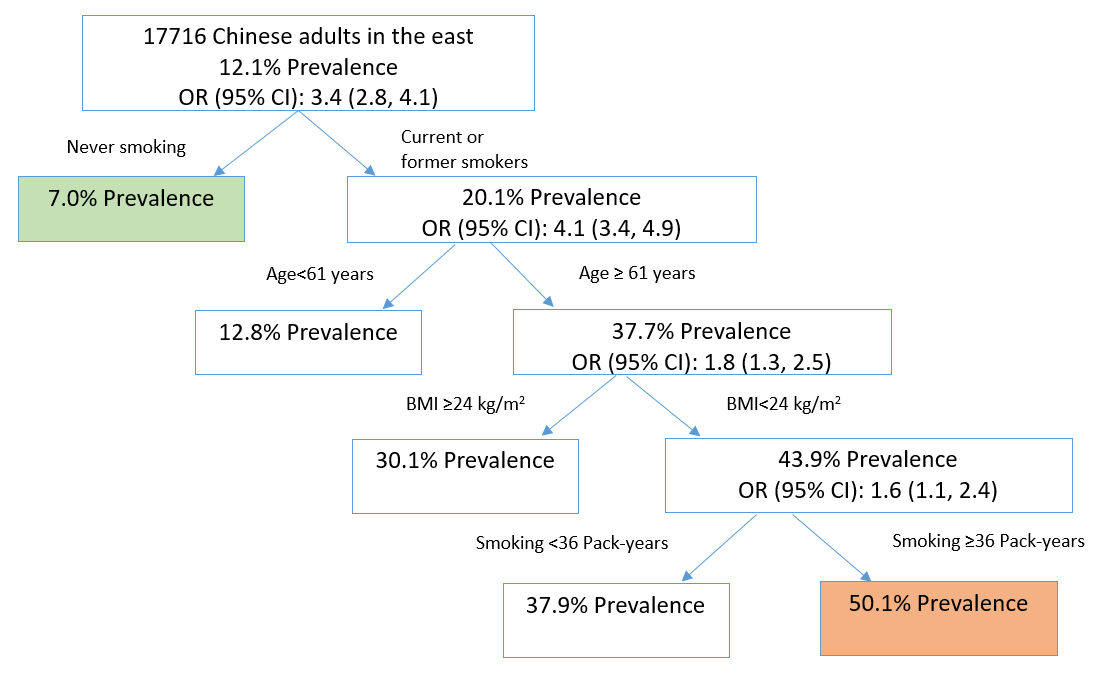


1. **North**


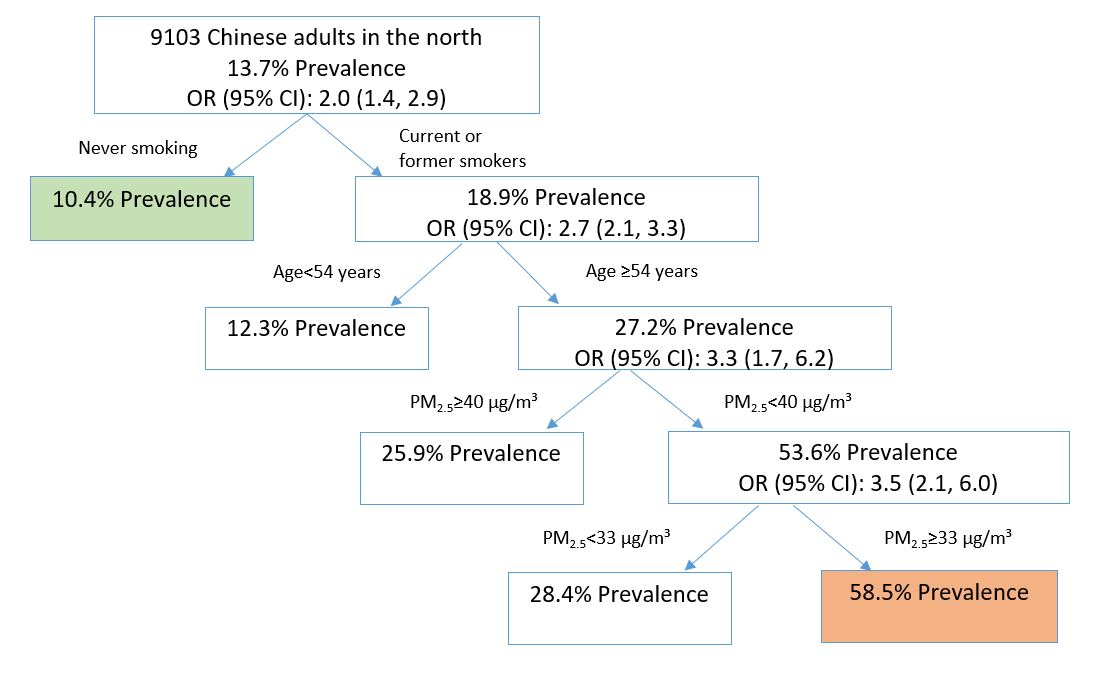


1. **Middle**


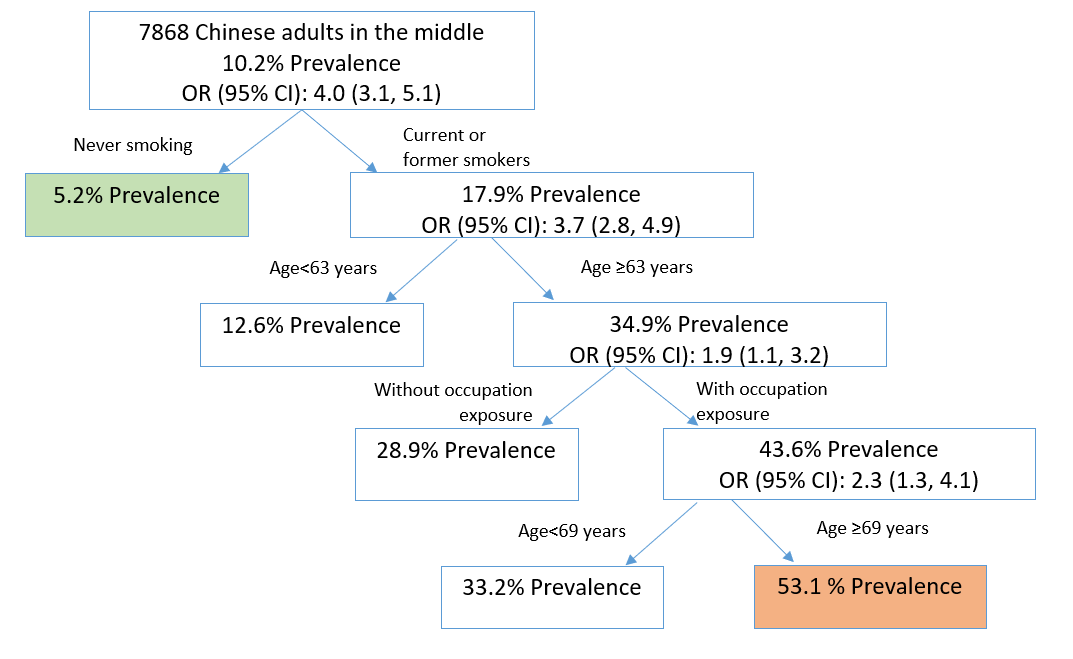


1. **South**


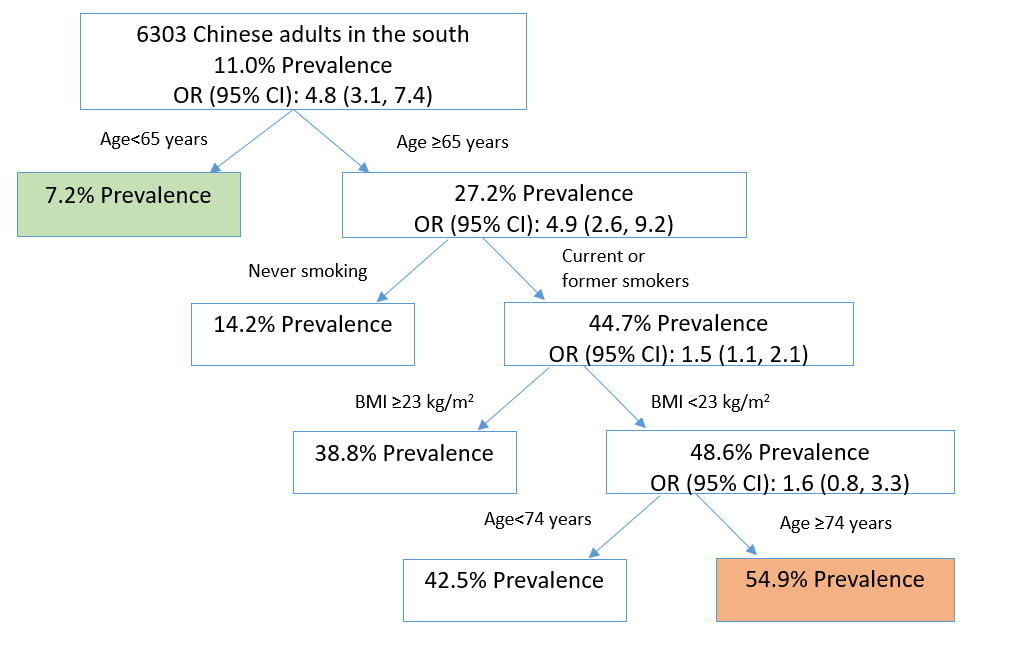


1. **Northeast**


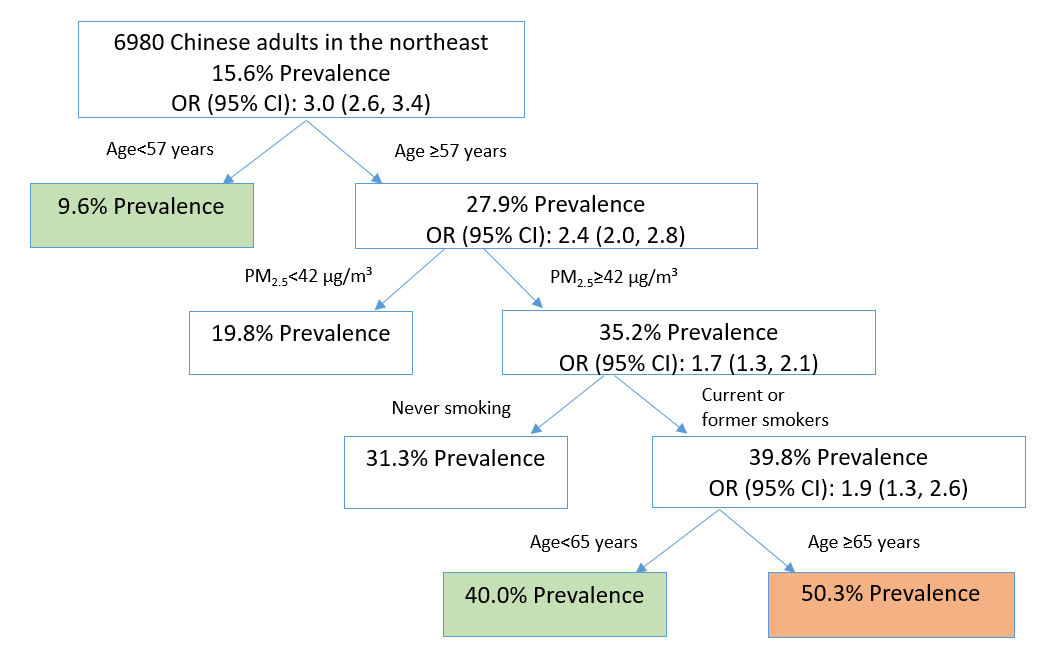


1. **Northwest**


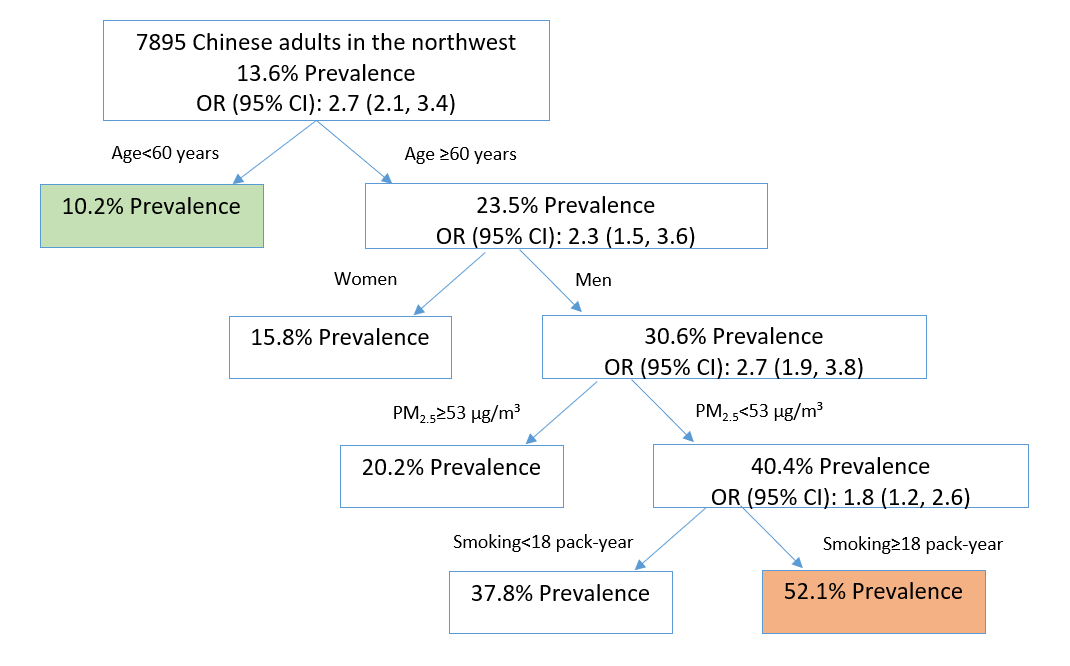


1. **Southwest**


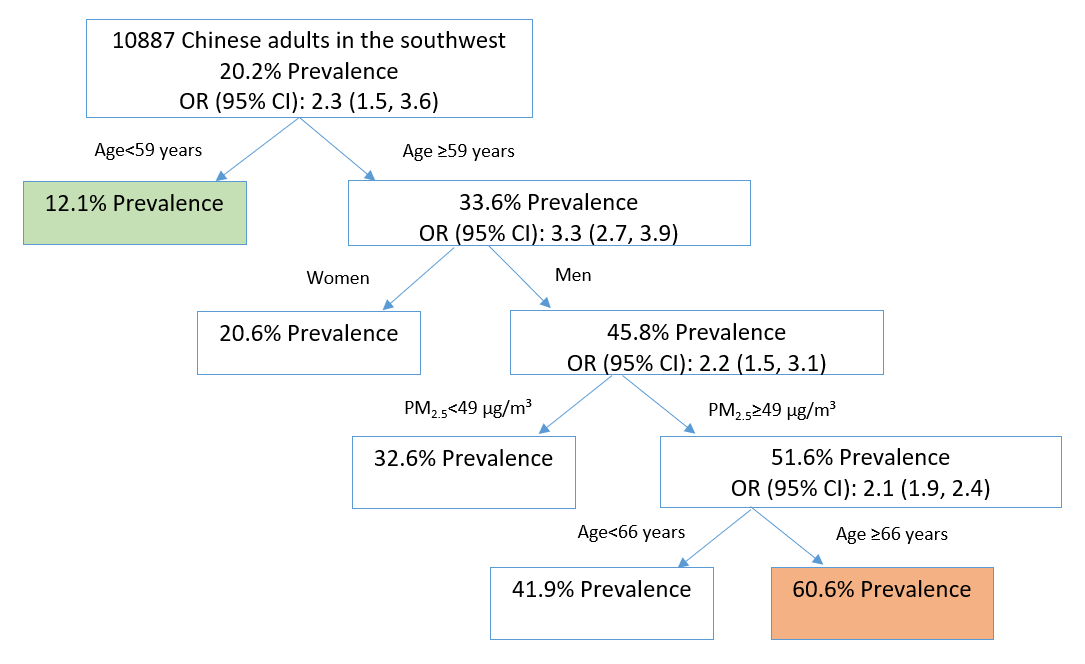


# e-Figure 2 Geographic disparities of COPD prevalence among different Chinese subpopulations aged 40 or older in 2015


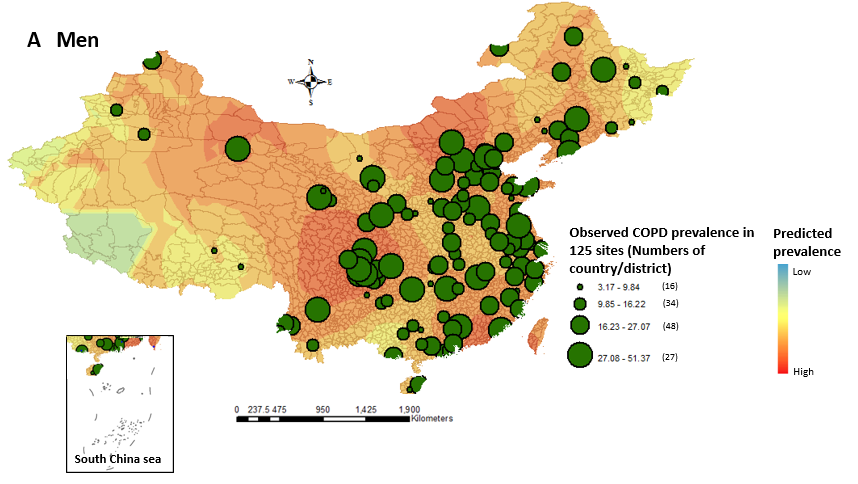


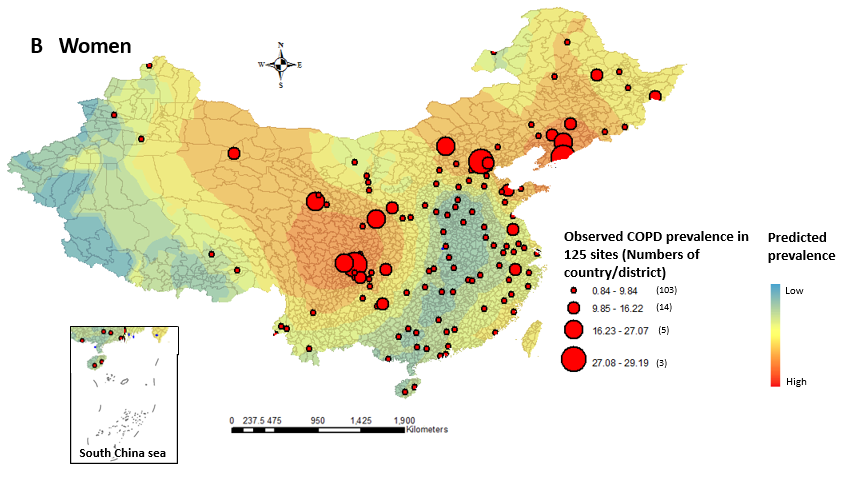


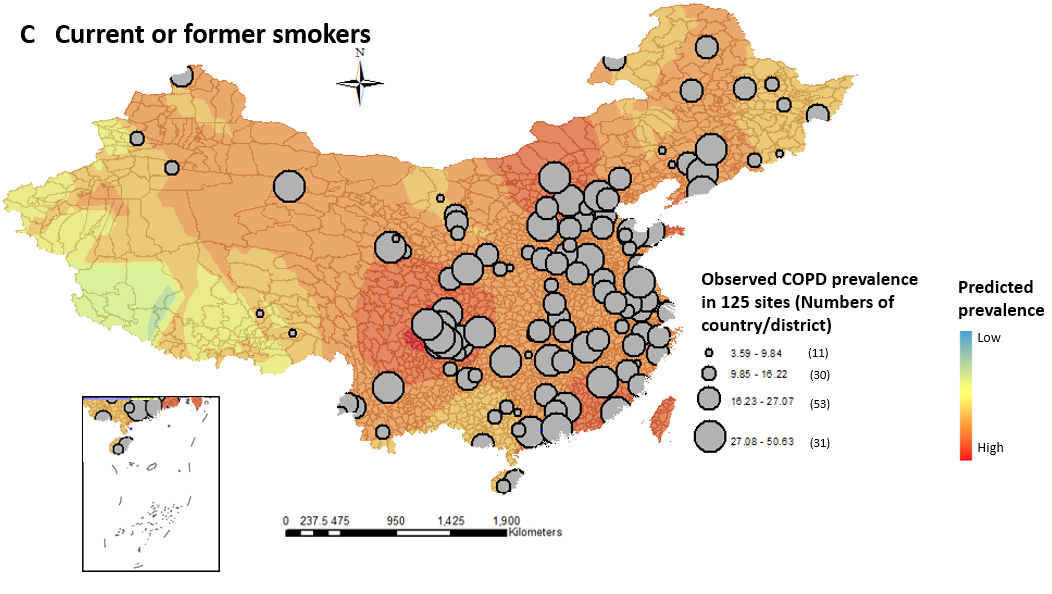


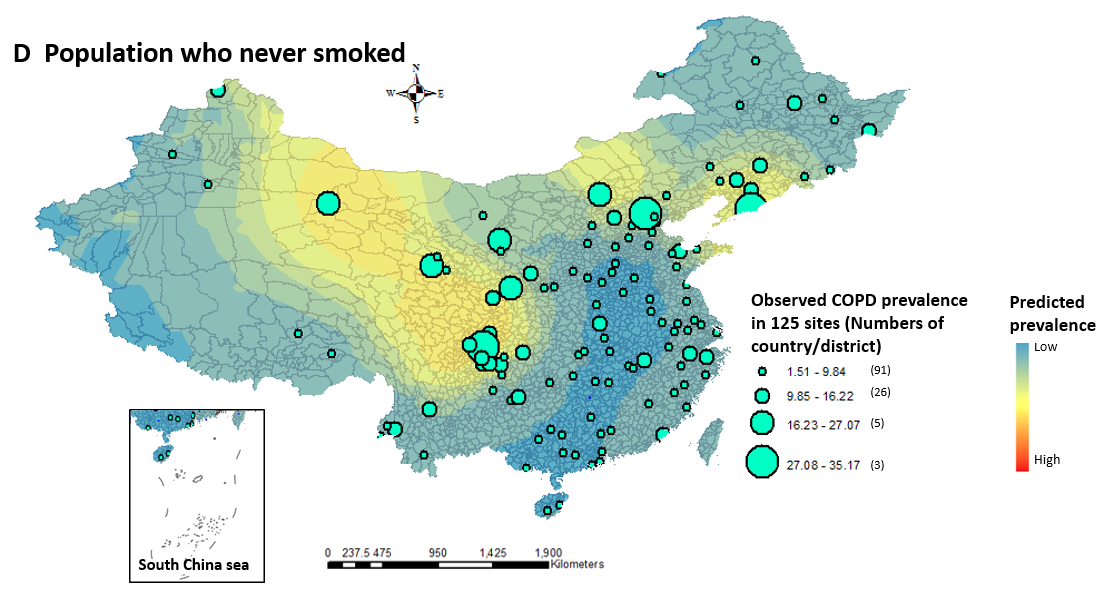


# e-Figure 3 Geographic disparities of the prevalence of current or former smoking among Chinese adults aged 40 or older in 2015


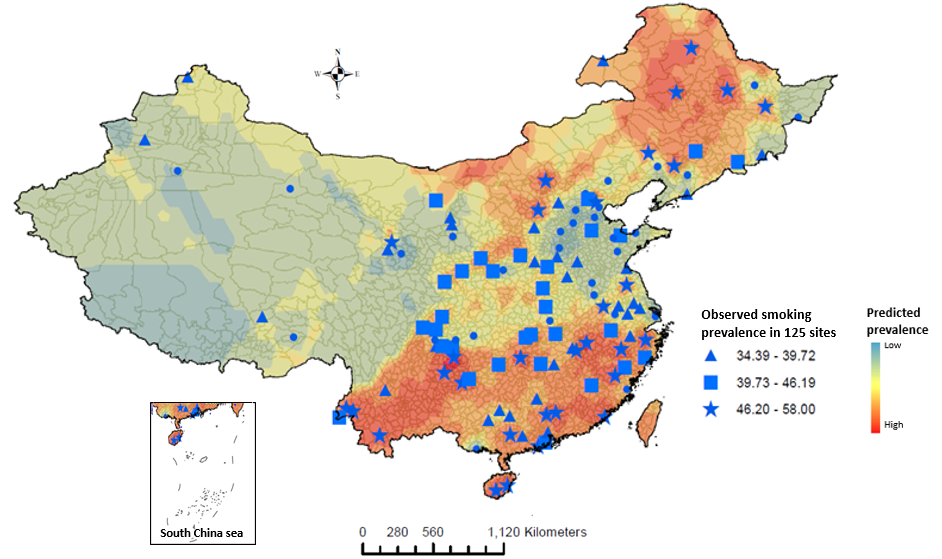


# e-Figure 4. Predicted COPD prevalence among different subpopulations in 31 provincial capitals of mainland China, 2015


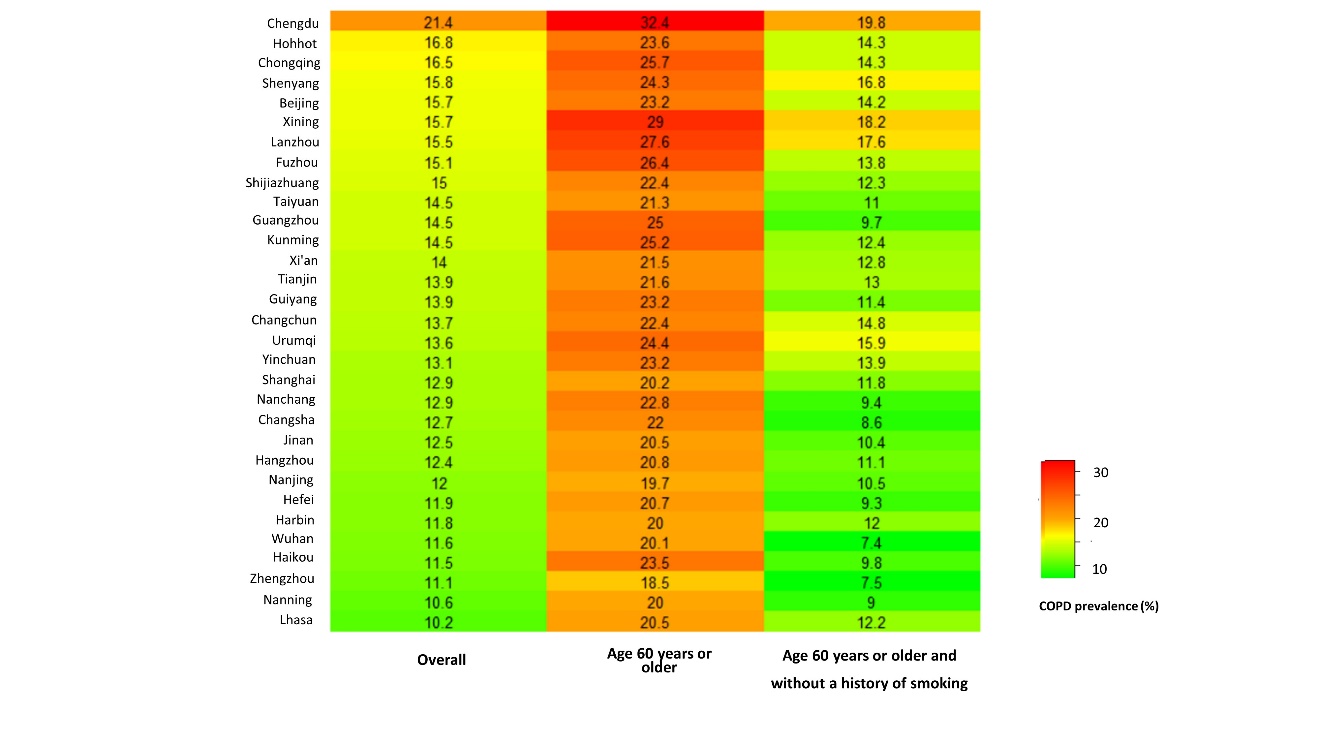


# e-Table 1 The ten cities with the highest and lowest predicted COPD prevalence among Chinese adults aged 40 or older and adults aged 40 to 59 without a history of smoking (sorted by descending order)

| **Overall** | | |  | **Age 40-59 years without a history of smoking** | | |
| --- | --- | --- | --- | --- | --- | --- |
| **Cities** | **Prevalence** | **95% CI** |  | **Cities** | **Prevalence** | **95 %CI** |
| **Top ten** |  |  |  | **Top ten** |  |  |
| Deyang, Sichuan | 21.8 | 21.6-22.0 |  | Mianyang, Sichuan | 9.7 | 9.5-9.9 |
| Chengdu, Sichuan | 21.4 | 21.2-21.5 |  | Deyang, Sichuan | 9.5 | 9.3-9.7 |
| Suining, Sichuan | 21.3 | 21.1-21.4 |  | Guangyuan, Sichuan | 9.5 | 9.3-9.7 |
| Meishan, Sichuan | 21.2 | 21.0-21.4 |  | Jiuquan, Gansu | 9.4 | 9.2-9.6 |
| Ziyang, Sichuan | 21.0 | 20.8-21.2 |  | Hami(Kumul), Xinjiang | 9.2 | 9.0-9.4 |
| Leshan, Sichuan | 21.0 | 20.8-21.2 |  | Ya'an, Sichuan | 9.2 | 9.0-9.4 |
| Mianyang, Sichuan | 20.8 | 20.7-21.0 |  | Aba, Sichuan | 9.2 | 9.0-9.4 |
| Ya'an, Sichuan | 20.8 | 20.7-20.9 |  | Meishan, Sichuan | 9.2 | 9.0-9.4 |
| Neijiang, Sichuan | 20.4 | 20.2-20.5 |  | Chengdu, Sichuan | 9.2 | 9.0-9.4 |
| Zigong, Sichuan | 20.2 | 20.0-20.5 |  | Longnan, Gansu | 9.1 | 8.9-9.3 |
| **Last ten** |  |  |  | **Last ten** |  |  |
| Chongzuo, Guangxi | 10.2 | 10.1-10.3 |  | Foshan, Guangdong | 3.5 | 3.4-3.6 |
| Shuangyashan, Heilongjiang | 10.2 | 10.1-10.2 |  | Shaoguan, Guangdong | 3.5 | 3.3-3.7 |
| Shannan, Tibet | 10.2 | 10.1-10.2 |  | Yangjiang, Guangdong | 3.5 | 3.5-3.5 |
| Qitaihe, Heilongjiang | 10.1 | 10.0-10.2 |  | Yunfu, Guangdong | 3.5 | 3.4-3.6 |
| Ili Kazak, Xinjiang | 10.0 | 9.9-10.2 |  | Maoming, Guangdong | 3.4 | 3.3-3.5 |
| Jixi, Heilongjiang | 9.9 | 9.8-10.0 |  | Chaozhou, Guangdong | 3.4 | 3.4-3.5 |
| Rikaze, Tibet | 9.7 | 9.6-9.8 |  | Heyuan, Guangdong | 3.4 | 3.4-3.5 |
| Kashgar, Xinjiang | 9.7 | 9.6-9.8 |  | Shantou, Guangdong | 3.3 | 3.2-3.4 |
| Kizilsu Kirghiz, Xinjiang | 9.1 | 9.1-9.2 |  | Jieyang, Guangdong | 3.3 | 3.2-3.4 |
| Ali, Tibet | 8.7 | 8.6-8.8 |  | Shanwei, Guangdong | 3.3 | 3.3-3.3 |

# e-Table 2 Spatial clusters of predicted COPD prevalence among Chinese adults aged 40 or older in 2015

| **Cluster No., location** | **Radius, (km)** | **Population aged ≥40 years (100,000)** | **No. of COPD cases (100,000)** | | **RR** | **95% CI** | ***P* value** |
| --- | --- | --- | --- | --- | --- | --- | --- |
| **Expected** | **Observed** |
| 1, Southeast of Sichuan | 118.0 | 160.9 | 22.2 | 34.0 | 1.55 | 1.55-1.56 | <.0001 |
| 2, South of Gansu, southwest of Shaanxi,  all areas of Sichuan and Chongqing, northwest of Guizhou, and north of Yunnan; | 501.4 | 636.6 | 88.0 | 11.8 | 1.41 | 1.40-1.41 | <.0001 |
| 3, North of Gansu, southwest of Shaanxi, and northeast of Sichuan | 280.3 | 160.9 | 22.2 | 29.3 | 1.33 | 1.33-1.33 | <.0001 |
| 4, Southwest of Sichuan and north of Yunnan | 265.4 | 120.8 | 16.7 | 21.3 | 1.28 | 1.28-1.29 | <.0001 |
| 5, Middle of Chongqing | 110.3 | 151.7 | 21.0 | 25.5 | 1.22 | 1.22-1.23 | <.0001 |
| 6, Middle of Inner Mongolia, north of Shanxi, and northwest of Hebei | 362.8 | 141.3 | 19.5 | 23.6 | 1.21 | 1.21-1.22 | <.0001 |
| 7, Southwest of Guizhou | 65.5 | 44.6 | 6.2 | 7.4 | 1.21 | 1.19-1.21 | <.0001 |
| 8, South, middle, and east of Liaoning | 222.1 | 168.4 | 23.3 | 27.5 | 1.19 | 1.18-1.19 | <.0001 |
| 9, Northeast of Xinjiang and northwest of Gansu | 348.0 | 9.6 | 1.3 | 1.6 | 1.18 | 1.17-1.20 | <.0001 |
| 10, East of Guangdong and south of Fujian | 247.9 | 166.0 | 22.9 | 26.6 | 1.16 | 1.16-1.17 | <.0001 |
| 11, Northeast of Beijing and northeast of Hebei | 158.4 | 99.1 | 13.7 | 15.5 | 1.13 | 1.13-1.14 | <.0001 |
| 12, North of Jiangxi, north and middle of Fujian, and east of Guangdong | 340.1 | 350.2 | 48.4 | 54.1 | 1.13 | 1.12-1.13 | <.0001 |
| 13, East and middle of Inner Mongolia, southwest of Heilongjiang, west and middle of Jilin, Liaoning, Beijing, Tianjin, Hebei, north of Shandong, and northeast of Shanxi | 730.6 | 992.6 | 137.2 | 149.9 | 1.11 | 1.11-1.12 | <.0001 |
| 14, East of Shandong | 187.2 | 144.5 | 20.0 | 22.0 | 1.10 | 1.10-1.11 | <.0001 |
| 15, South of Zhejiang, northeast and middle of Fujian | 232.1 | 159.6 | 22.1 | 23.2 | 1.05 | 1.05-1.06 | <.0001 |
| 16, Middle of Guangdong | 85.5 | 77.8 | 10.8 | 11.1 | 1.04 | 1.03-1.04 | <.0001 |
| 17, East of Beijing, Tianjin, and east of Hebei | 173.7 | 120.8 | 16.7 | 17.3 | 1.03 | 1.03-1.04 | <.0001 |
| 18, Middle of Shandong | 95.6 | 72.3 | 10.0 | 10.3 | 1.03 | 1.03-1.04 | <.0001 |
| 19, Middle and north of Jilin, and southwest of Heilongjiang | 209.0 | 106.4 | 14.7 | 15.1 | 1.03 | 1.02-1.03 | <.0001 |
| 20, West and middle of Guizhou | 199.5 | 100.4 | 13.9 | 14.1 | 1.02 | 1.01-1.02 | <.0001 |
| 21, West of Jiangxi | 134.1 | 78.7 | 10.9 | 11.0 | 1.01 | 1.01-1.02 | <.0001 |
| 22, Middle of Shaanxi | 67.0 | 25.3 | 3.5 | 3.5 | 1.01 | 1.00-1.01 | .004 |
